# Supplementary material for: Inviting Schools in the United States of America and Hong Kong: An Appreciative Inquiry.
Source: Royal Society of Chemistry journal article supplement (doi:10.1039/d4nr02819h), 2009-01-01
Supplement: d4nr02819h1.pdf [file d4nr02819h1.pdf]

## Supplementary Information

### Tailored MXene-derived Nano-Heterostructure Oxide for Peroxymonosulfate Activation in the Treatment of Municipal Wastewaters

Shalu Atri,<sup>a,b\*</sup> Elham Loni,<sup>b</sup> Zuzana Dyrčikova,<sup>c</sup> Frantisek Zazimal,<sup>d</sup> Maria Caplovicova,<sup>e</sup> Dana Dvoranova,<sup>c</sup> Gustav Plesch,<sup>a</sup> Miroslava Kabatova,<sup>f</sup> Marcello Brigante,<sup>g</sup> Michael Naguib,<sup>b,h\*</sup> Olivier Monfort<sup>a\*</sup>

<sup>a</sup> Department of Inorganic Chemistry, Faculty of Natural Sciences, Comenius University Bratislava, Ilkovicova 6, Mlynska Dolina, SK-842 15 Bratislava, Slovak Republic

<sup>b</sup> Department of Physics and Engineering Physics, Tulane University, New Orleans, Louisiana 70118, United States of America

<sup>c</sup> Institute of Physical Chemistry and Chemical Physics, Faculty of Chemical and Food Technology, Slovak University of Technology in Bratislava, Radlinskeho 9, SK-812 37 Bratislava, Slovak Republic

<sup>d</sup> Department of Plasma Physics and Technology, Faculty of Science, Masaryk University, Kotlarska 267/2, 611 37 Brno, CZ-602 00, Czech Republic

<sup>e</sup> STU Center for Nanodiagnostics, Faculty of Materials Science and Technology in Trnava, Slovak University of Technology in Bratislava, Vazovova 5, SK-812 43 Bratislava, Slovak Republic

<sup>f</sup> Bratislavská vodárenská spoločnosť a.s., Prešovská 48, 826 46 Bratislava, Slovak Republic

<sup>g</sup> Université Clermont Auvergne, CNRS, Institut de Chimie de Clermont-Ferrand, Clermont-Ferrand, F-63000, France

<sup>h</sup> Department of Chemistry, Tulane University, New Orleans, Louisiana 70118, United States of America

\*Corresponding authors: shalu1@uniba.sk (SA); naguib@tulane.edu (MN); olivier.monfort@uniba.sk (OM)

## Supplementary Information

### Text S1

In dosage variation experiments (Figure S4), an increased trend was observed in the apparent kinetic constant values with increasing dosage of  $\text{TiNbO}_x$ . The constant was  $0.0266 \text{ min}^{-1}$  for  $0.2 \text{ g L}^{-1}$  which was 1.5 and 1.3 times the rate constants of  $0.04 \text{ g L}^{-1}$  and  $0.1 \text{ g L}^{-1}$  dosage, while it was equivalent when  $0.4 \text{ g L}^{-1}$  was used. This trend can be ascribed to an increased number of surface-active sites to activate PMS, the higher dosage could lead to more collision, accumulation, or precipitation of  $\text{TiNbO}_x$ , but also more light dispersion or even screening effect from the catalyst [1]. Since, maximum removal of CAF was observed in 120 minutes, with  $0.2 \text{ g L}^{-1}$  of  $\text{TiNbO}_x$ , it was taken as the optimal condition for further studies (Figure S4a,b).

The concentration of PMS was varied from  $0.2 - 5.0 \text{ mM}$  (Figure S4c,d). The apparent kinetic constant of CAF degradation first increased up to  $0.047 \text{ min}^{-1}$  using  $2.0 \text{ mM}$  PMS and then become constant (Figure S4c). At high concentrations of PMS, the scavenging role of PMS towards the generated ROS such as  $\cdot\text{OH}$  and  $\text{SO}_4^{\cdot-}$  is higher [2].

Initial pH value has also a crucial role in the degradation of the pollutants since it has a very strong effect in managing the catalyst charge surface but also the ionic form of the pollutants. Since CAF is a weak electrolyte with a  $\text{pK}_a$  of 10.4 [3], so only a protonated form of caffeine exists in the investigated pH range (between 3 and 9). The effect of initial pH was monitored on CAF degradation by adjusting pH at 3, 5, 7, and 9 after the addition of  $0.5 \text{ mM}$  of PMS and employing  $0.2 \text{ g L}^{-1}$  of  $\text{TiNbO}_x$ . Figure S4e shows that with increasing pH from 3 to 9, the degradation efficiency decreases in the following order 84 %, 81 %, 63 %, and 27 %, respectively, after 2 hours of reaction. Likewise, the apparent kinetic constants decrease with increasing pH from  $0.021 \text{ min}^{-1}$  to  $0.002 \text{ min}^{-1}$  (Figure S4f). The  $\text{pH}_{\text{zpc}}$  value of  $\text{TiNbO}_x$ , was determined to be 5.64 by using the drift method (Figure S5) [4], which suggested surface of  $\text{TiNbO}_x$  will be negatively charged at  $\text{pH} > \text{pH}_{\text{zpc}}$  and positively charged at  $\text{pH} < \text{pH}_{\text{zpc}}$ . Thereby, in acidic pH,  $\text{TiNbO}_x$  is positively charged and better interacts with CAF especially ketone and aromatic functions which are rich in electrons, while in alkaline pH electrostatic repulsions might occur. Considering pH variation, we found experiments conducted by utilizing  $0.5 \text{ mM}$  PMS in deionized water without pH adjustment, resulted in maximum degradation of pollutants.

## Supplementary Information

### Text S2

The contribution percentage of reactive oxygen species (ROS) in the degradation of CAF and sulfamethoxazole (SMX) in the presence of different scavengers, such as TBA, ISOP, and ISOP+FFA, can be calculated by following the equations S1, S2, and S3:

$$[\bullet OH]\% = \frac{k_{control}' - k_{TBA}'}{k_{control}'} \times 100\% \quad (S1)$$

$$[SO_4^{\bullet -}]\% = \frac{(k_{control}' - k_{ISOP}') - (k_{control}' - k_{TBA}')}{k_{control}'} = \frac{k_{TBA}' - k_{ISOP}'}{k_{control}'} \times 100\% \quad (S2)$$

$$[^1O_2]\% = \frac{(k_{control}' - k_{ISOP+FFA}') - (k_{control}' - k_{ISOP}')}{k_{control}'} = \frac{k_{ISOP}' - k_{ISOP+FFA}'}{k_{control}'} \times 100\% \quad (S3)$$

### Text S3

X-ray photoelectron spectroscopy (XPS) is a well-known advanced sensitive technique for the detection of chemical changes in the proximity of atoms forming the surface in the depth from 1 to 10 nm. Thereby, high-resolution spectra of Ti 2p, Nb 3d, O 1s, and C 1s present in TiNbO<sub>x</sub> were examined to explore its surface chemistry (Fig. S11). The peak fitting of these spectra is presented in Fig. S12. The Ti 2p spectra of the TiNbO<sub>x</sub> sample consist of doublet Ti 2p<sub>3/2</sub> and Ti 2p<sub>1/2</sub> lines at positions 458.90 eV and 464.6 eV, respectively (Fig. S12a-c). Notably, the area of 2p<sub>3/2</sub> and Ti 2p<sub>1/2</sub> correspond to the theoretical ratio 2:1. The Ti 2p spectra represent the presence of Ti<sup>4+</sup> ions in the TiO<sub>2</sub> oxide and the Ti<sub>2</sub>Nb<sub>10</sub>O<sub>29</sub> consistently with the results of XRD analysis [5]. The Nb 3d spectra (Fig. S12d-f) consist of Nb 3d<sub>5/2</sub> and Nb 3d<sub>3/2</sub> lines at positions 207.3 eV and 210.0 eV, respectively. The corresponding peak area meets the theoretical ratio of 3:2. The splitting of doublet lines in the Nb 3d spectra corresponds to the Nb<sup>5+</sup> ions in the structure of Ti<sub>2</sub>Nb<sub>10</sub>O<sub>29</sub>

## Supplementary Information

[6]. The O 1s spectra (Fig. S12g-i) were fitted by component at 530.2 eV corresponding to metal oxide bonds (Ti-O, Nb-O), at 531.4 eV to hydroxyl groups bonded to metallic elements and defective oxygen sites, and at 532.6 eV to oxygen-containing organic contaminants and adsorbed water. The C 1s spectra (Fig. S12j-l) of the consist of C-C (C-H), C-O, C=O, and O-C=O components at positions 248.8 eV, 286.3 eV, 287.8 eV, and 288.8 eV. These components are assigned to adventitious carbon contaminants arising due to the usage of MXene as template material (Figure S11d) [7] and exposure of samples to ambient air.

### Text S4

To estimate the role of the main reactive oxygen species (ROS) (equation S4), second-order rate constants were considered between selected ROS and pollutants (Table S4).

$$\frac{c_{quencher} \times k_{oxidant\ species, quencher}}{c_{quencher} \times k_{oxidant\ species, quencher} + c_{pollutant} \times k_{oxidant\ species, pollutant}} \quad (S4)$$

where  $c_{quencher}$  and  $c_{pollutant}$  were the initial concentrations of scavenger and pollutants, while  $k_{oxidant\ species, quencher}$  was the second order rate constant for the targeted ROS and  $k_{oxidant\ species, pollutant}$  was the rate constant for pollutant and the targeted ROS, respectively.

**Table S1** EDS analysis table for MXene (Ti<sub>0.75</sub>Nb<sub>0.25</sub>CT<sub>x</sub>) and TiNbO<sub>x</sub> derived from MXene.

| Element   | Ti <sub>0.75</sub> Nb <sub>0.25</sub> CT <sub>x</sub> | TiNbO <sub>x</sub> |
|-----------|-------------------------------------------------------|--------------------|
| <b>Ti</b> | 18.06±2.83                                            | 13.13±0.98         |
| <b>Nb</b> | 5.52±0.55                                             | 4.19±0.37          |
| <b>O</b>  | 24.05±0.73                                            | 68.65±2.28         |
| <b>C</b>  | 36.64±2.34                                            | 13.02±3.26         |
| <b>F</b>  | 11.35±0.71                                            | 0.15±0.14          |
| <b>Cl</b> | 4.04±0.45                                             | 0.01±0.01          |
| <b>Al</b> | 0.34±0.21                                             | 0.86±0.09          |

## Supplementary Information

**Table S2** LC-MS data of SMX degradation by-products.

| Compound   | Rt<br>(min) | Exp<br>[M+H] <sup>+</sup>                           | Theor<br>[M+H] <sup>+</sup> | Δ <sub>mmu</sub> | Exp.<br>[M-H] <sup>-</sup> | Theor.<br>[M-H] <sup>-</sup> | Δ <sub>mmu</sub> | Molecular<br>formula                                            | Proposed Structure                                                                    |
|------------|-------------|-----------------------------------------------------|-----------------------------|------------------|----------------------------|------------------------------|------------------|-----------------------------------------------------------------|---------------------------------------------------------------------------------------|
| <b>SMX</b> | 3.20        | 254.0588<br><br>276.0407<br><br>[M+Na] <sup>+</sup> | 254.0594                    | 0.57             | 252.0445                   | 252.0437                     | 0.77             | C <sub>10</sub> H <sub>11</sub> N <sub>3</sub> O <sub>3</sub> S | 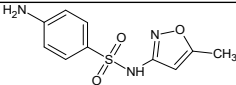   |
| P1         | 2.28        | 254.0587                                            | 254.0594                    | 0.69             | 252.0445                   | 252.0437                     | 0.75             | C <sub>10</sub> H <sub>11</sub> N <sub>3</sub> O <sub>3</sub> S | 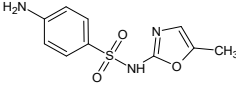  |
| P2         | 1.92        | 270.0537                                            | 270.0543                    | 0.65             | 268.0398                   | 268.0387                     | 1.11             | C <sub>10</sub> H <sub>11</sub> N <sub>3</sub> O <sub>4</sub> S | 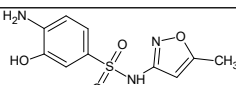 |
| P3         | 3.24        |                                                     |                             |                  | 284.0347                   | 284.0336                     | 1.16             | C <sub>10</sub> H <sub>11</sub> N <sub>3</sub> O <sub>5</sub> S | 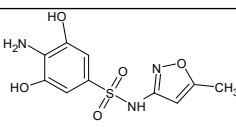 |
| P4         | 3.16        | 254.0587                                            | 254.0594                    | 0.70             | 252.0444                   | 252.0437                     | 0.67             | C <sub>10</sub> H <sub>11</sub> N <sub>3</sub> O <sub>3</sub> S | 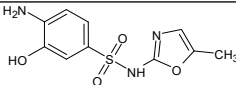 |
| P5         | 1.92        |                                                     |                             |                  | 172.0064                   | 172.0063                     | 0.08             | C <sub>6</sub> H <sub>7</sub> N <sub>3</sub> O <sub>3</sub> S   | 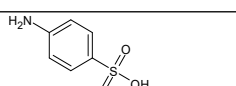 |
| P6         | 1.13        | 99.0556                                             | 99.0553                     | 0.28             |                            |                              |                  | C <sub>4</sub> H <sub>6</sub> N <sub>2</sub> O                  | 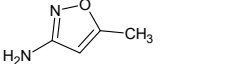 |
| P7         | 1.29        |                                                     |                             |                  | 196.0178                   | 196.0175                     | 0.30             | C <sub>7</sub> H <sub>7</sub> N <sub>3</sub> O <sub>2</sub> S   | 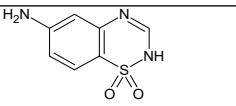 |

## Supplementary Information

|     |      |          |          |      |          |          |      |                                                                 |                                                                                     |
|-----|------|----------|----------|------|----------|----------|------|-----------------------------------------------------------------|-------------------------------------------------------------------------------------|
| P8  | 4.21 | 268.0383 | 268.0387 | 0.32 | 266.0241 | 266.0230 | 1.08 | C <sub>10</sub> H <sub>9</sub> N <sub>3</sub> O <sub>4</sub> S  | 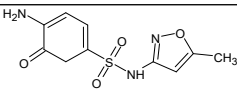 |
| P9  | 3.17 | 254.0588 | 254.0594 | 0.63 | 252.0445 | 252.0437 | 0.71 | C <sub>10</sub> H <sub>11</sub> N <sub>3</sub> O <sub>3</sub> S | 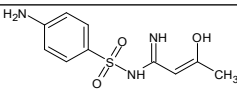 |
| P10 | 2.09 | 272.0691 | 272.0700 | 0.87 | 270.0553 | 270.0543 | 1.10 | C <sub>10</sub> H <sub>13</sub> N <sub>3</sub> O <sub>4</sub> S | 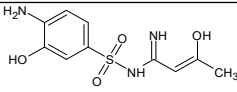 |
| P11 | 1.66 | 288.0641 | 288.0649 | 0.78 | 286.0504 | 286.0492 | 1.16 | C <sub>10</sub> H <sub>13</sub> N <sub>3</sub> O <sub>5</sub> S | 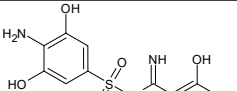 |

**Table S3** Physicochemical characteristics of tertiary effluents of WWTP Bratislava-Petrzalka collected on 10/10/2023 and provided by BVS a.s. (Bratislava Water Company)

| Test                           | Quantity                |
|--------------------------------|-------------------------|
| Chemical oxygen demand         | 26 mg L <sup>-1</sup>   |
| Biological oxygen demand       | 3.0 mg L <sup>-1</sup>  |
| Non-dissolved matter at 105 °C | 10 mg L <sup>-1</sup>   |
| Total inorganic nitrogen       | 9.31 mg L <sup>-1</sup> |
| Total phosphor                 | 0.55 mg L <sup>-1</sup> |

| Pollutants | $k_{\bullet OH}$<br>[M <sup>-1</sup> s <sup>-1</sup> ] | $k_{SO_4^{\bullet -}}$<br>[M <sup>-1</sup> s <sup>-1</sup> ] | $k_{1O_2}$<br>[M <sup>-1</sup> s <sup>-1</sup> ] | Reference |
|------------|--------------------------------------------------------|--------------------------------------------------------------|--------------------------------------------------|-----------|
|            |                                                        |                                                              |                                                  |           |

### Supplementary Information

|                  |                    |                    |                    |       |
|------------------|--------------------|--------------------|--------------------|-------|
| Caffeine         | $6.40 \times 10^9$ | $2.39 \times 10^9$ | $2.90 \times 10^7$ | 8,9   |
| Sulfamethoxazole | $6.98 \times 10^9$ | $2.98 \times 10^9$ | $1.34 \times 10^6$ | 10,11 |

**Table S4** Second order rate constants of pollutants with different reactive oxygen species (ROS).

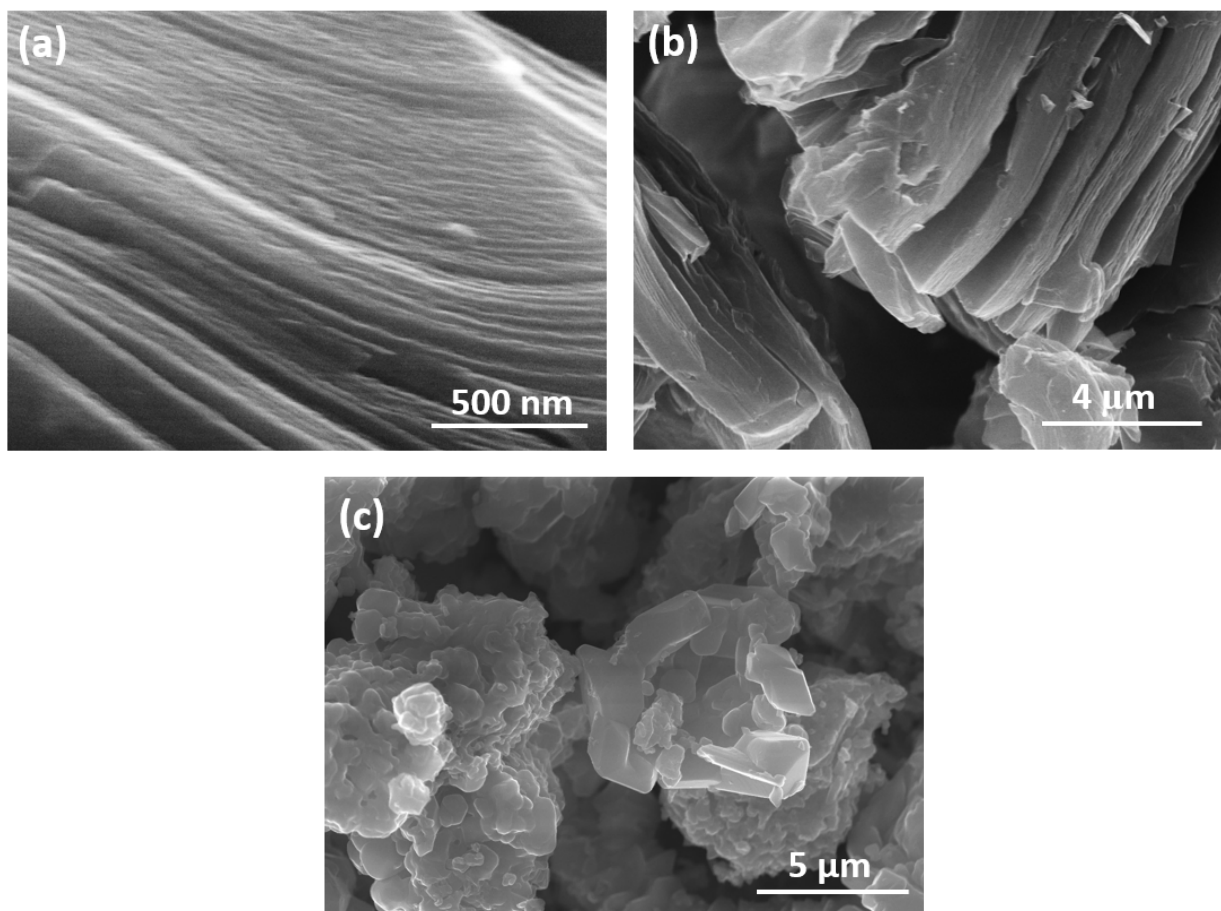

## Supplementary Information

**Fig. S1** SEM images of (a)  $(\text{Ti}_{0.75}\text{Nb}_{0.25})_2\text{AlC}$ , (b)  $(\text{Ti}_{0.75}\text{Nb}_{0.25})_2\text{CT}_x$  and its derived (c)  $\text{TiNbO}_x$ .

## Supplementary Information

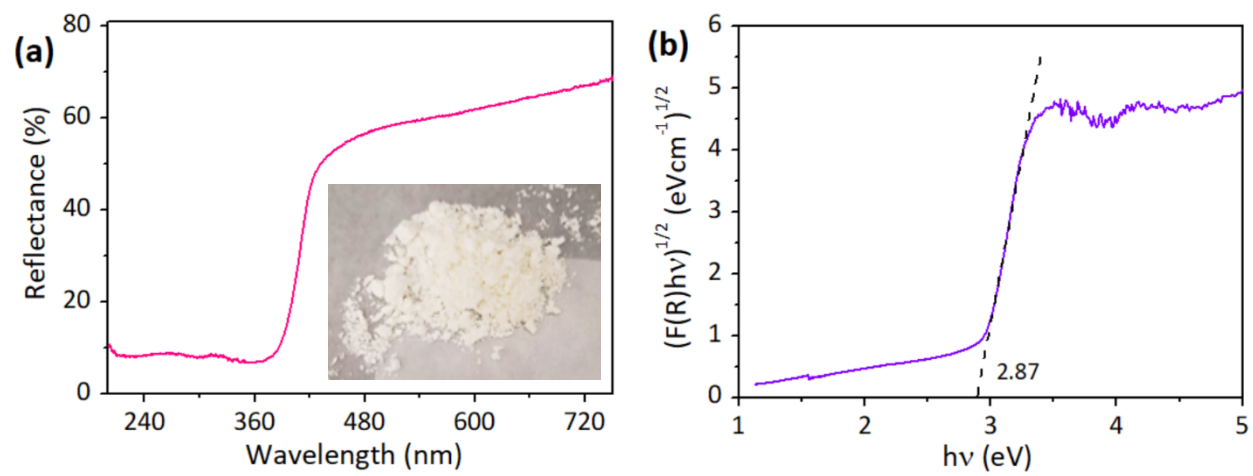

## Supplementary Information

**Fig. S2** (a) DRS spectra of  $\text{TiNbO}_x$  and their corresponding (b) Tauc's plot. Inset in (a) shows image of  $\text{TiNbO}_x$  powder.

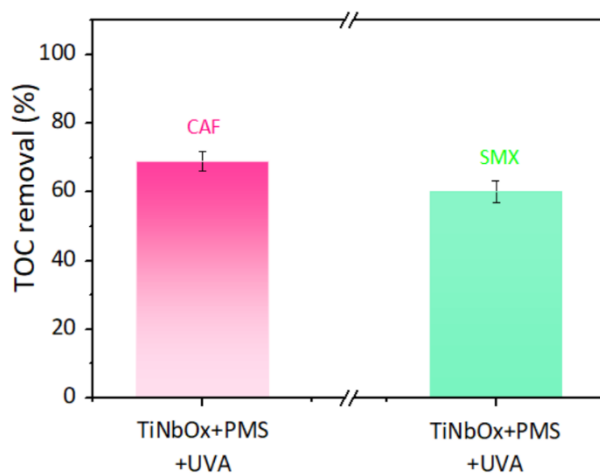

**Fig. S3** Evaluation of mineralization extents (TOC removal in %) of CAF and SMX degradation using  $\text{TiNbO}_x$  under UVA irradiation in the presence of PMS after 2h.

## Supplementary Information

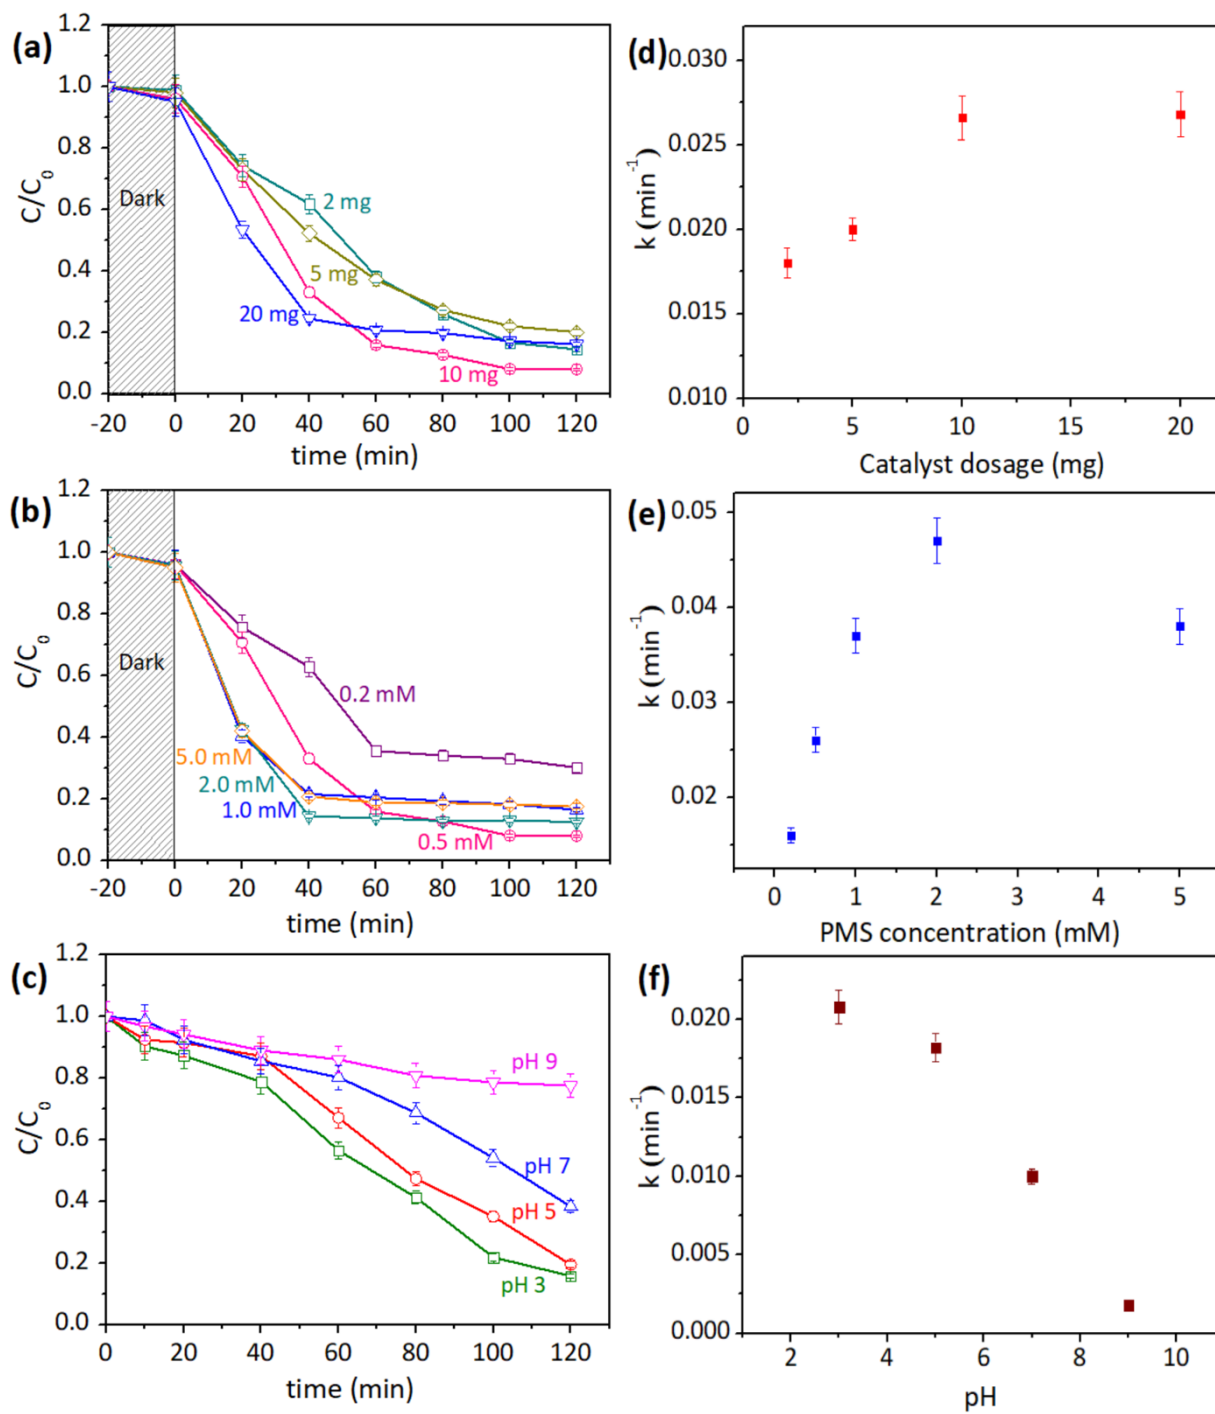

## Supplementary Information

**Fig. S4** CAF degradation with (a) different  $\text{TiNbO}_x$  dosages in the presence of 0.5 mM PMS; (b) different PMS concentrations using  $0.2 \text{ g L}^{-1}$   $\text{TiNbO}_x$  and (c) different pH using  $0.2 \text{ g L}^{-1}$   $\text{TiNbO}_x$  in the presence of 0.5 mM PMS. Initial concentration of CAF was  $50 \mu\text{M}$  at natural pH of deionized (DI) water and (d-f) corresponding rate constant dependences on the pH values.

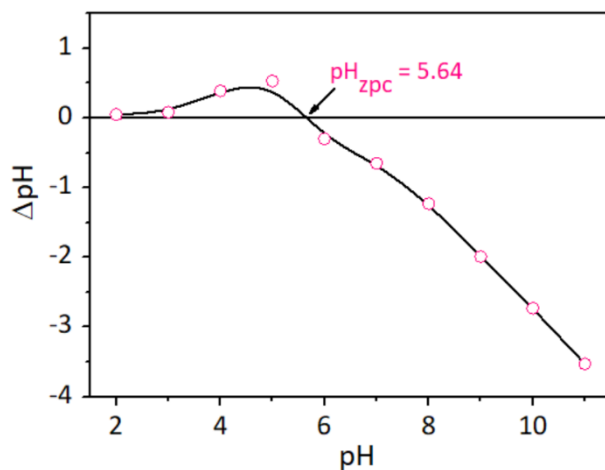

**Fig. S5** Assessment of pH of zero-point charge ( $\text{pH}_{\text{PZC}}$ ) of  $\text{TiNbO}_x$  using the drift method.

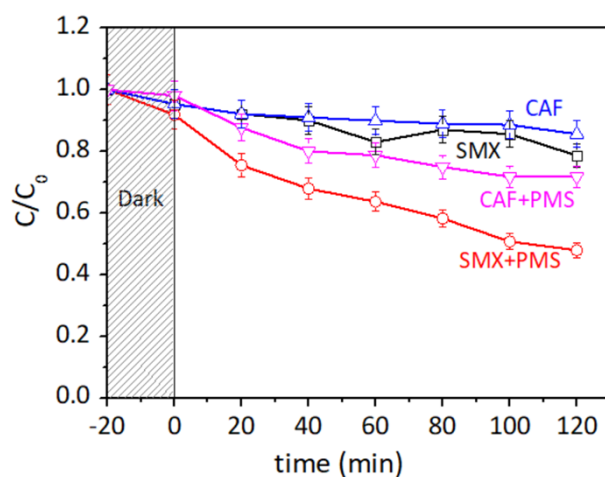

**Fig. S6** Degradation curves of CAF and SMX by using  $0.2 \text{ g L}^{-1}$  of  $\text{TiO}_2$  prepared from the thermal oxidation of  $\text{Ti}_2\text{CT}_x$  MXene, with and without 0.5 mM PMS under UVA irradiation at natural pH.

## Supplementary Information

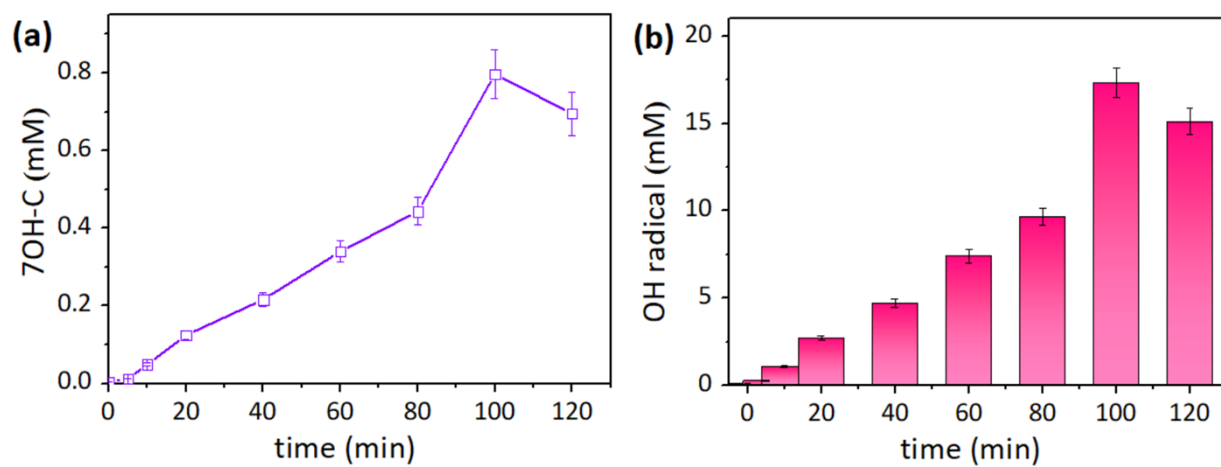

## Supplementary Information

**Fig. S7** (a) 7-hydroxycoumarin (7OH-C) production using coumarin as probe molecule at natural pH under UVA using  $0.2 \text{ g L}^{-1}$   $\text{TiNbO}_x$  in the presence of  $0.5 \text{ mM}$  PMS and (b) the corresponding production of hydroxyl radicals calculated from the 4.6% production of 7OH-C [12].

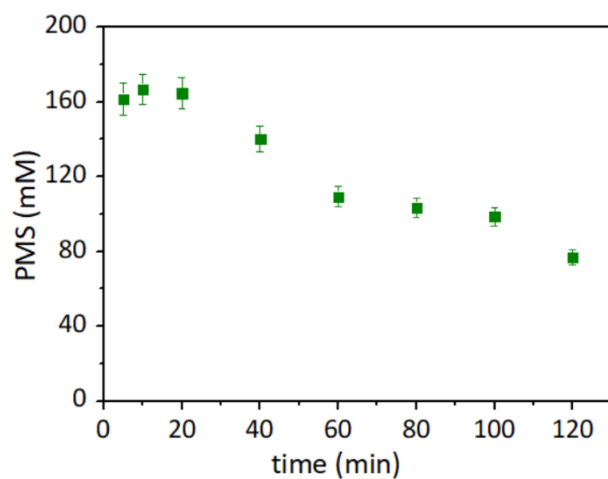

**Fig. S8** Spectrophotometric determination of PMS consumption during the degradation of CAF at natural pH under UVA using  $0.2 \text{ g L}^{-1}$   $\text{TiNbO}_x$  in the presence of  $0.5 \text{ mM}$  PMS.

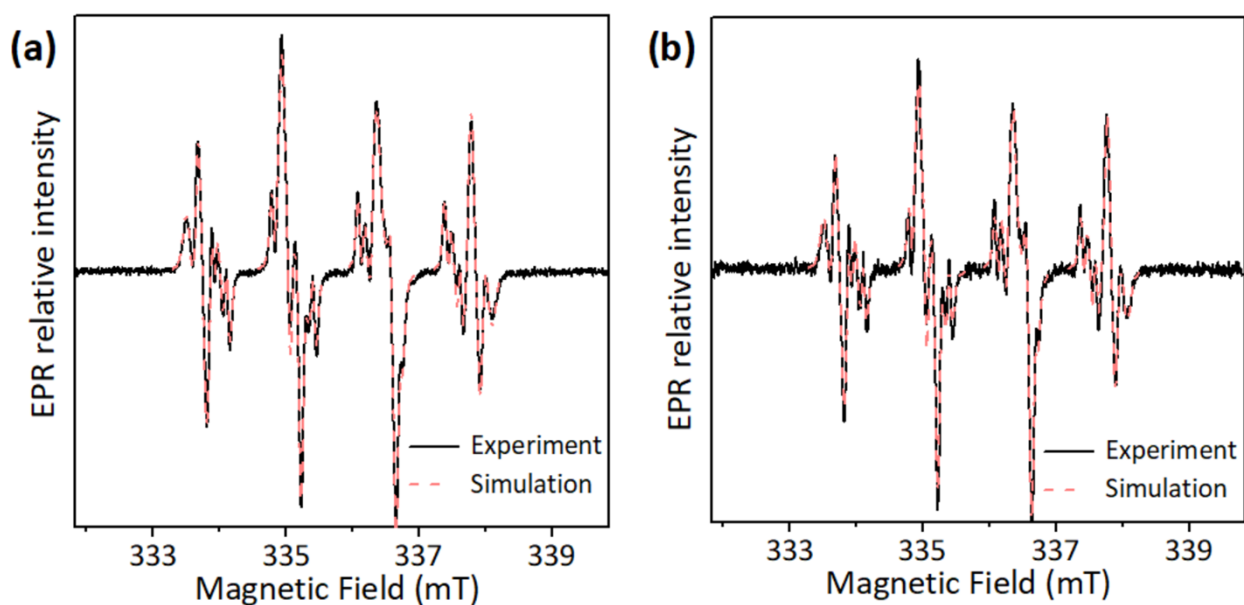

## Supplementary Information

**Fig. S9** Experimental and simulated EPR spectra of  $\text{TiNbO}_x/\text{CAF}/\text{PMS}$  in (a) aerated and (b) deaerated aqueous suspensions measured after UVA exposure ( $\text{LED}@365\text{ nm}$ ; radiation dose  $6.4\text{ J cm}^{-2}$ ) in the presence of BMPO spin trap. Initial concentrations:  $c(\text{TiNbO}_x) = 0.2\text{ g L}^{-1}$ ,  $c_0(\text{CAF}) = 50\text{ }\mu\text{M}$ ,  $c_0(\text{PMS}) = 0.5\text{ mM}$ ,  $c_0(\text{BMPO}) = 35\text{ mM}$ .

## Supplementary Information

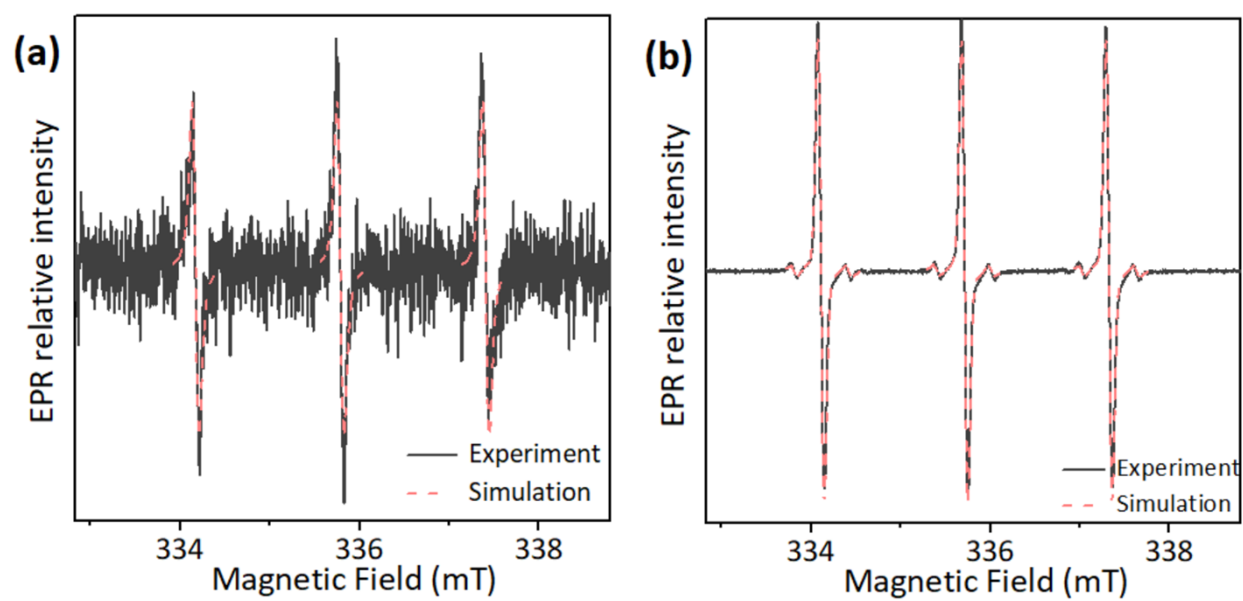

## Supplementary Information

**Fig. S10** Experimental and simulated EPR spectra of stable free radical Tempone formed in (a)  $\text{TiNbO}_x/\text{SMX}/\text{TMPO}/\text{air}$  suspension upon UVA exposure ( $\text{LED@365 nm}$ ; radiation dose  $6.4 \text{ J cm}^{-2}$ ) with initial concentrations:  $c(\text{TiNbO}_x) = 0.2 \text{ g L}^{-1}$ ,  $c_0(\text{SMX}) = 50 \text{ }\mu\text{M}$ ,  $c_0(\text{TMPO}) = 50.0 \text{ mM}$  and (b)  $\text{PMS}/\text{TMPO}/\text{air}$  in dark with initial concentrations  $c_0(\text{PMS}) = 0.24 \text{ mM}$ ,  $c_0(\text{TMPO}) = 0.24 \text{ mM}$ . Spin Hamiltonian parameters for stable nitroxide free radical with resolved  $^{13}\text{C}$  satellites obtained from simulation analysis:  $a_{\text{N}} = 1.612 \text{ mT}$ ,  $a_{^{13}\text{C}}(2 \times ^{13}\text{C}) = 0.245 \text{ mT}$ ,  $a_{^{13}\text{C}}(6 \times ^{13}\text{C}) = 0.639 \text{ mT}$ ;  $g = 2.0057$

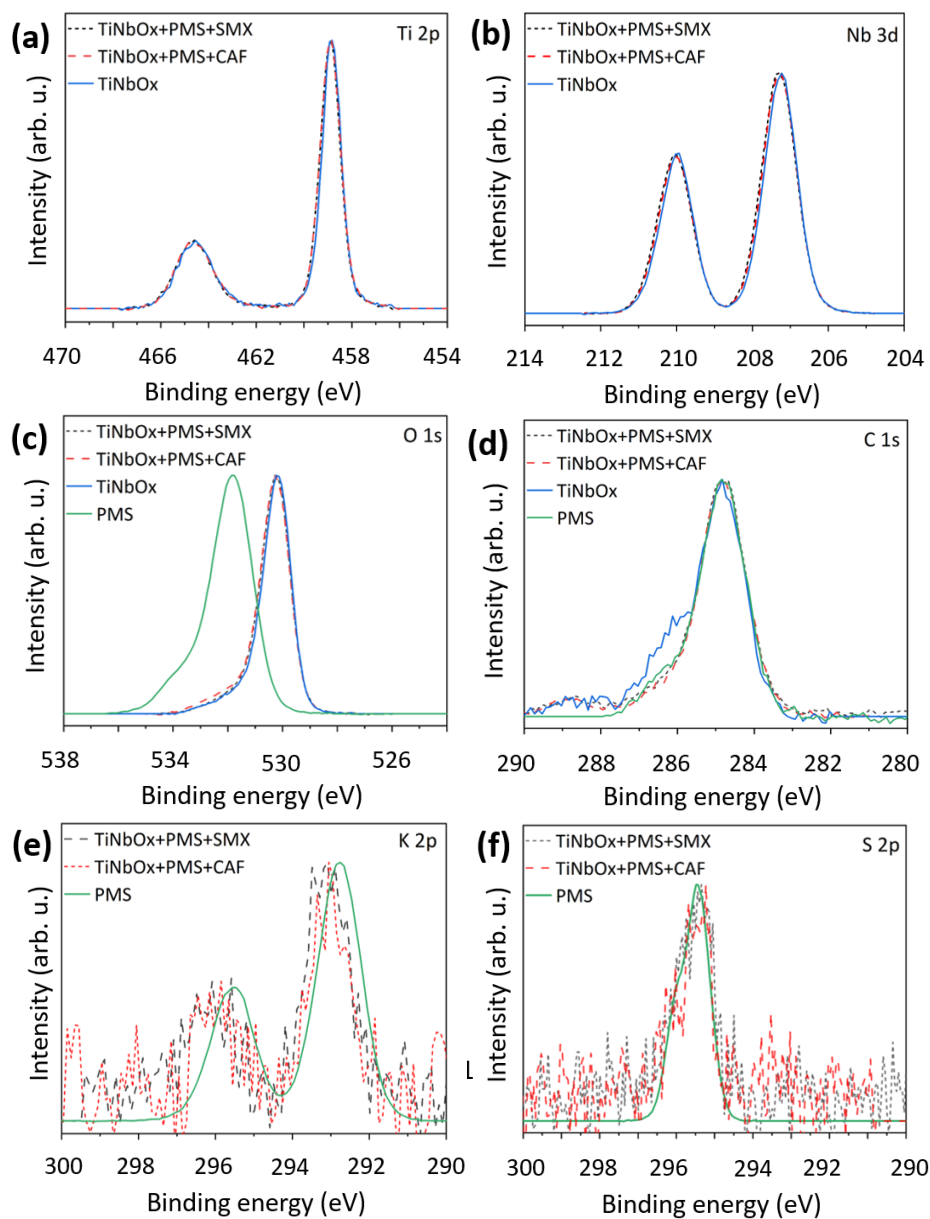

## Supplementary Information

**Fig. S11** High-resolution spectra of Ti 2p (a), Nb 3d (b), O 1s (c), C 1s (d), K 2p (e), and S 2p (f) of TiNbO<sub>x</sub> sample before and after CAF or SMX degradation. The spectra are referenced using peak at 284.8 eV corresponding to C-C/C-H bonds.

## Supplementary Information

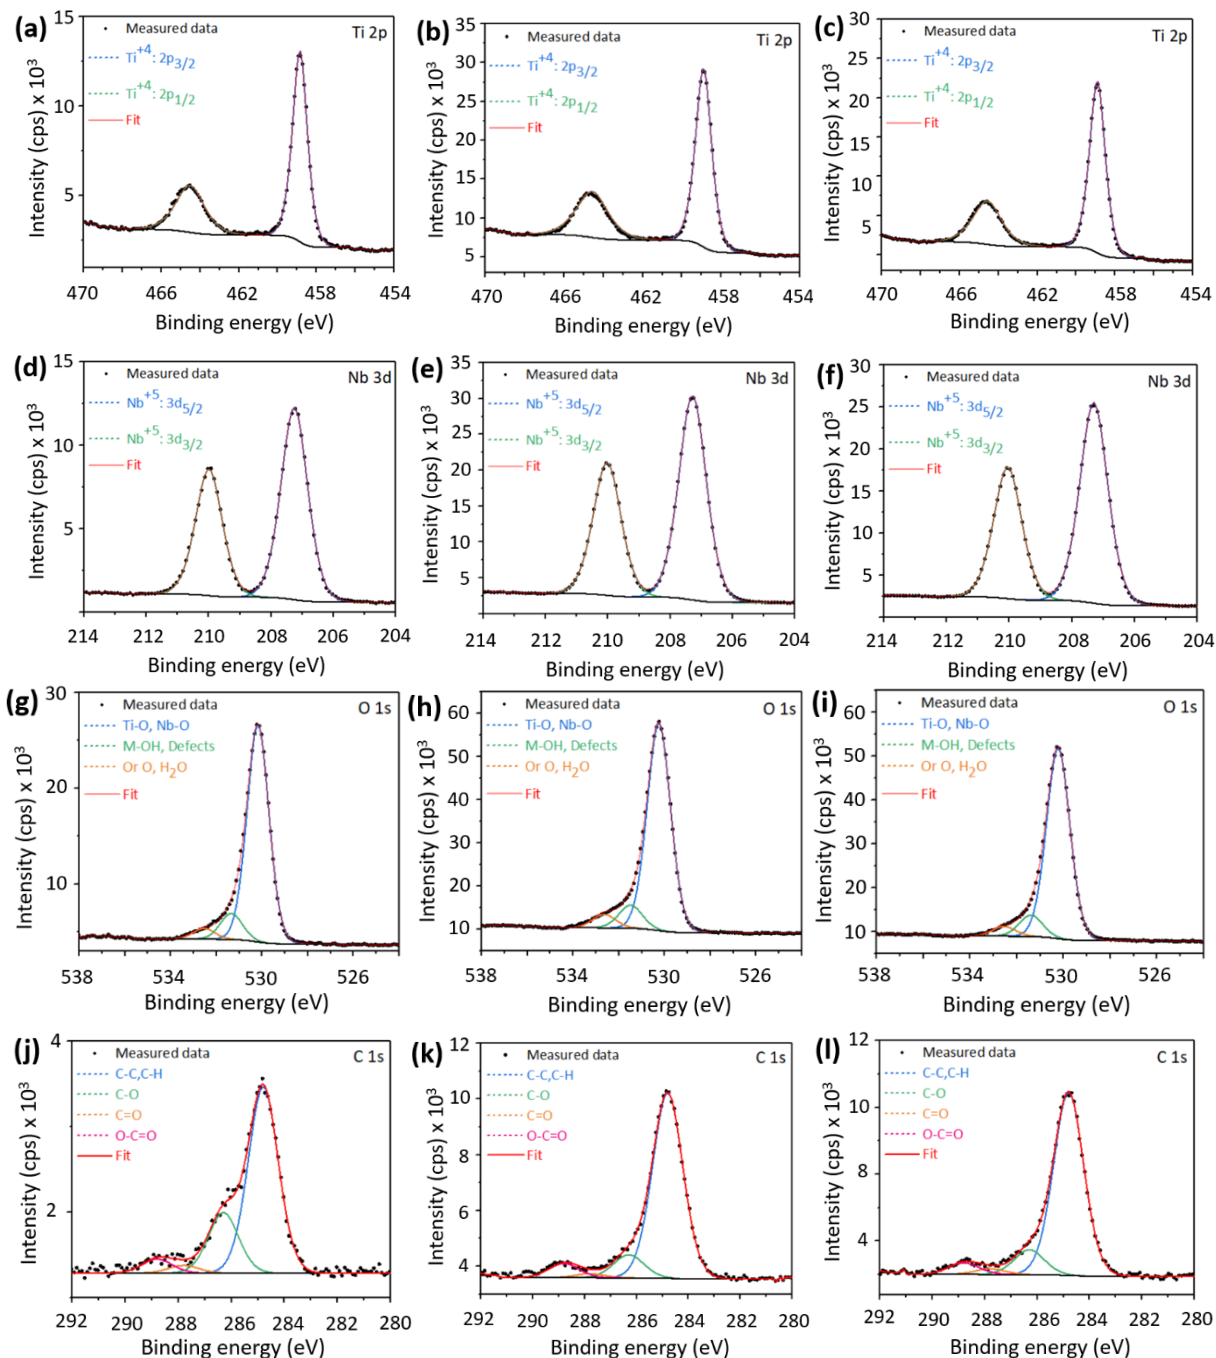

## Supplementary Information

**Fig. S12** Peak fitting of high resolution XPS spectra of Ti 2p, Nb 3d, O 1s, C 1s for TiNbO<sub>x</sub> sample (a,d,g,j) before and after (b,e,h,k) CAF and (c,f,i,l) SMX degradation. The spectra are referenced using peak at 284.8 eV corresponding to C-C/C-H bonds.

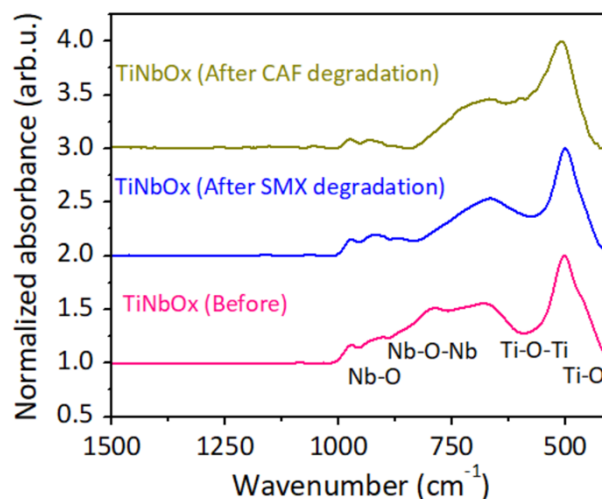

**Fig. S13** FTIR spectra of TiNbO<sub>x</sub> before and after SMX and CAF degradation.

## References

- [1] Beheshti, F., Tehrani, R.M.A., Khadir, A. Sulfamethoxazole removal by photocatalytic degradation utilizing TiO<sub>2</sub> and WO<sub>3</sub> nanoparticles as catalysts: analysis of various operational parameters. *Inter. J. Environ. Sci. Technol.* **2019**, *16*, 7987-7996.
- [2] U. Ushani, X. Lu, J. Wang, Z. Zhang, J. Dai, Y. Tan, S. Wang, W. Li, C. Niu, T. Cai, N. Wang and G. Zhen, Sulfate radicals-based advanced oxidation technology in various environmental remediation: A state-of-the-art review. *Chem. Eng. J.* 2020, **402**, 126232.
- [3] J.A. Quintero-Jaramillo, J.I. Carrero-Mantilla and N.R. Sanabria-Gonzalez, A review of caffeine adsorption studies onto various types of adsorbents. *Sci. World J.* 2021, **2021**, 1-18.

## Supplementary Information

- [4] M. Khanal, D. Rai, R. Khanal and A. Bhattarai, Determination of point zero charge (PZC) of homemade charcoals of shorea robusta (Sakhuwa) and pinus roxburghii (Salla). *Inter. J. Eng. Res. Technol.* 2020, **9(10)**, 2278-0181.
- [5] M.C. Biesinger, L.W. Lau, A.R. Gerson and R.S.C. Smart, Resolving surface chemical states in XPS analysis of first row transition metals, oxides and hydroxides: Sc, Ti, V, Cu and Zn. *Appl. Surf. Sci.* 2010, **257(3)**, 887-898.
- [6] J.J.R. Rumble, D.M. Bickham and C.J. Powell, The NIST X-ray photoelectron spectroscopy database. *Surf. Interface Anal.* 1992, **19(1-12)**, 241-246.
- [7] M.C. Biesinger, Accessing the robustness of adventitious carbon for charge referencing (correction) purposes in XPS analysis: Insights from a multi-user facility data review. *Appl. Surf. Sci.* 2022, **597**, 153681.
- [8] T.P. Devasagayam, J.P. Kamat, H. Mohan and P.C. Kesavan, Caffeine as an antioxidant: inhibition of lipid peroxidation induced by reactive oxygen species. *Biochim. Biophys. Acta* 1996, **1282**, 63-70.
- [9] M. Nihemaiti, D.B. Miklos, U. Hübner, K.G. Linden, J.E. Drewes and J.-P. Croue, Removal of trace organic chemicals in wastewater effluent by UV/H<sub>2</sub>O<sub>2</sub> and UV/PDS. *Water Res.* 2018, **145**, 487-497.
- [10] L. Gao, Q. Mao, S. Luo, L. Cao, X. Xie, Y. Yang, Y. Deng and Z. Wei, Experimental and theoretical insights into kinetics and mechanisms of hydroxyl and sulfate radicals-mediated degradation of sulfamethoxazole: Similarities and differences. *Environ. Pollut.* 2020, **259**, 113795.
- [11] A.M. Lastre-Acosta, B.S. Cristofoli, M.P.S. Parizi, D.C.A.O. Nascimento, A.C.S.C. Teixeira, Photochemical persistence of sulfa drugs in aqueous medium: kinetic study and mathematical simulations. *Environ. Sci. Pollut. Res.* 2021, **28**, 23887-23895.

## Supplementary Information

[12] A. Marion, M. Brigante and G. Mailhot, A new source of ammonia and carboxylic acids in cloud water: The first evidence of photochemical process involving an iron-amino acid complex. *Atmos. Environ.* 2018, **195**, 179-186.
